# Supplementary material for: Rapid and sensitive detection of circulating tumor DNA via a CRISPR/Cas12a-based catalytic hairpin assembly
Source: Royal Society of Chemistry journal article supplement (doi:10.1039/d5ay01624j), 2025-11-22
Supplement: d5ay01624j1.pdf [file d5ay01624j1.pdf]

## Supplemental Material

### Rapid and sensitive detection of circulating tumor DNA via CRISPR/Cas12a-based catalytic hairpin assembly

Songbai Tian<sup>1#</sup>, Lingzi Yao<sup>3#</sup>, Feng Gong<sup>2\*</sup>, Ying Li<sup>4</sup>, Yujie Zhao<sup>3\*</sup>, Yixia Yang<sup>5\*</sup>

1 School of Basic Medical Sciences, Hubei University of Medicine, 442000, Shiyan, China

2 School of Laboratory Medicine & Translational Medicine Research Center, North Sichuan Medical College, Nanchong, 637000, China

3 Guangxi Key Laboratory of Special Biomedicine; School of Medicine, Guangxi University, Nanning, 530004, China

4 Cancer Hospital, Guangxi Medical University, Nanning, 530022, China

5 Guangdong Provincial Key Laboratory of Digestive Cancer Research, Precision Medicine Center, The Seventh Affiliated Hospital, Sun Yat-Sen University, Shenzhen 518107, China

#These authors made equal contributions to this work

\*Corresponding authors

GongFeng@whu.edu.cn (F. Gong)

zhaoyujiehn@163.com (Y. Zhao)

yangyixia05@126.com (Y. Yang)

## S1 Apparatus

Fluorescence detection was carried out by a FL970 fluorescence spectrometer of Techcomp (Shanghai, China). Electrophoresis assay was performed by a mini vertical cell with BEP-600 electrophoresis power (Brandt Instrument Equipment Co., Ltd., Beijing, China) and the electrophoretic images were collected using FluorChem E chemiluminescence gel imaging system, which was ordered from ProteinSimple (USA).

Table S1. Oligonucleotide sequences used in this work

| Name       | Sequence (5'-3')                                                |
|------------|-----------------------------------------------------------------|
| ctDNA      | CCGTGCAGCTCATCATGCAGCTCATGCCCT                                  |
| crRNA      | UAAUUUCUACUAAGUGUAGAUGCAUGAGCUGCAUGAUGAGCUG                     |
| Trigger    | ATTGGCACCCGCAATCCTGCTA                                          |
| FQ-trigger | [FAM]_ATTGGCACCCGCAATCCTGCTA_[BHQ1]                             |
| M1         | [FAM]_ATTGGCACCCGCAATAGGATTAATAGCAGGATTGCGGGTGC<br>CAAT_[BHQ-1] |
| M2         | AGGATTAATAGCAGGATTGGCACCCGCAATCCTGCTATTAATCCTA<br>TTGCGGG       |
| Mis-1      | CCGTGCAGCTCATCACGCAGCTCATGCCCT                                  |
| Mis-2      | CCGTGCAGCACATGATGCAGCTCATGCCCT                                  |
| Mis-3      | CCGTGCAGCACATGATGCAGGTCATGCCCT                                  |
| random     | CGAGCATTCGACCAGGTTGTGTGTTCACTG                                  |
| MiR-21     | TAGCTTTCAGACTGATGTTGA                                           |
| Let-7a     | TGAGGTAGTAGGTTGTATAGTT                                          |
| HBV        | TTCAGTTATATGGATGATGTGGTA                                        |
| HIV        | ACTGCTAGAGATTTTCCACAT                                           |

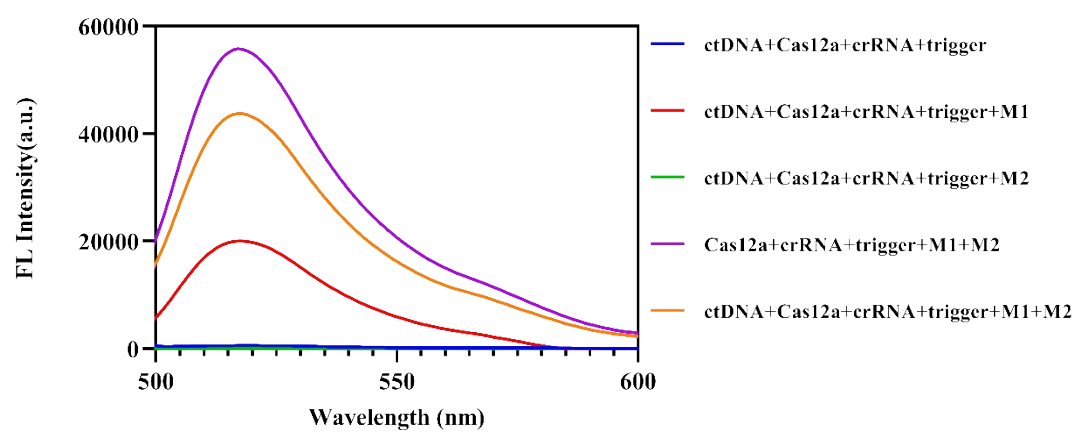

Fig. S1. Fluorescence spectra of different conditions for the detection of ctDNA.

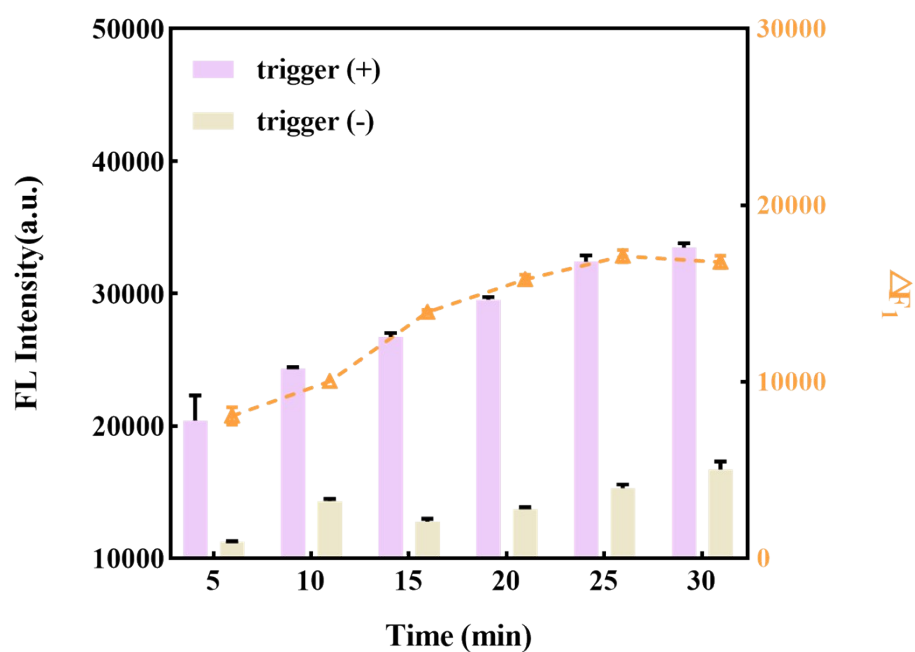

Fig. S2. Optimization of experimental conditions for CHA assay. The effect of incubation time. The error bars are the standard deviation of three replicate measurements.

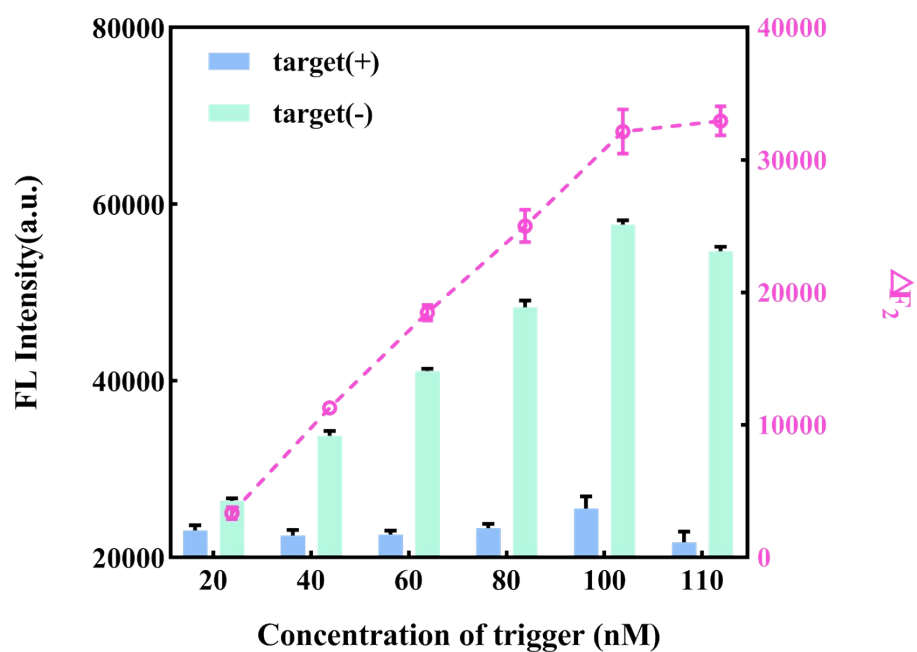

Fig. S3. Optimization of experimental conditions for Cas12a-CHA assay. The effect of trigger concentration. The error bars are the standard deviation of three replicate measurements.

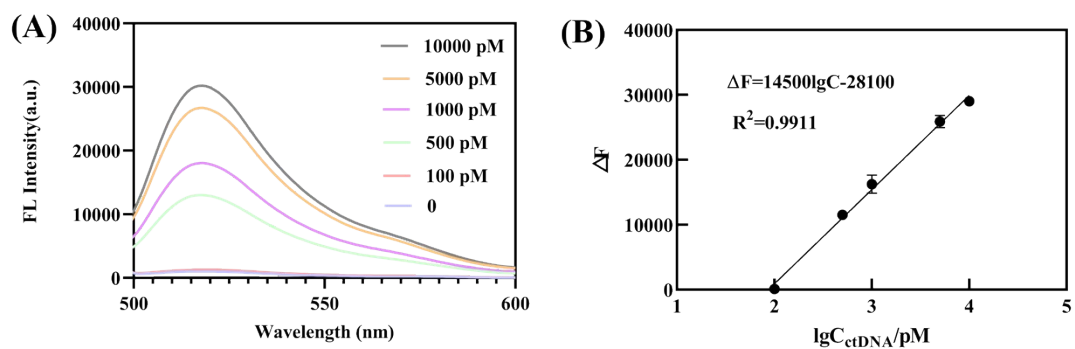

Fig. S4. (A) Fluorescence spectra of CRISPR/Cas12a for different concentration of ctDNA, (B) linear relationship between  $\Delta F$  and concentration of ctDNA. The error bars are the standard deviation of three replicate measurements.
